# Supplementary material
Source: Research Square preprint supplement (doi:10.21203/rs.3.rs-9263975/v1)
Supplement: Supplementary file 1 [file 0760819672c64be37f5d7f4a.xlsx]

## Sheet: t1
	Category	Count	Percentage / Ratio
	Total Embryos Transplanted	113	1
	Live-born Pups	86	76.1% (Birth Rate)
	Non-KO Recipients	64	~74.4% of births
	KO Recipients	22	~25.6% of births
